# Supplementary material
Source: publisher figshare collection journal article supplement (https://acs.figshare.com/ndownloader/files/24635252)
Supplement: Supplementary file 1 [file 24635252]

# Supporting Information

## Tailoring the Nanostructure of Graphene as an Oil-Based Additive: toward Synergistic Lubrication with an Amorphous Carbon Film

*Xiaowei Li,<sup>1,2\*</sup> Dekun Zhang,<sup>1\*</sup> Xiaowei Xu,<sup>3</sup> and Kwang-Ryeol Lee<sup>2\*</sup>*

<sup>1</sup> School of Materials and Physics, China University of Mining and Technology, Xuzhou 221116 P.R. China

<sup>2</sup> Computational Science Center, Korea Institute of Science and Technology, Seoul 136-791, Republic of Korea

<sup>3</sup> School of Physical Science and Technology, ShanghaiTech University, Shanghai 201210, P.R. China

### Corresponding Authors

#### **\*Xiaowei Li**

Tel: 82-2-958-5450; Fax: 82-2-958-5451. E-mail: lixw0826@gmail.com

#### **\*Dekun Zhang**

Tel: +86 13952207958. E-mail: dkzhang@cumt.edu.cn

#### **\*Kwang-Ryeol Lee**

Tel: 82-2-958-5494; Fax: 82-2-958-5451. E-mail: krlee@kist.re.kr

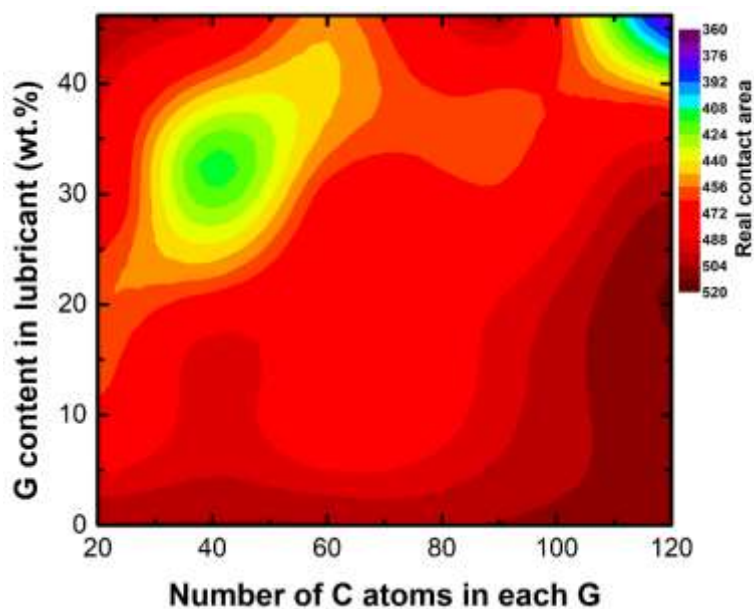

**Figure S1.** Changes of real contact area with size and content of G additive (unit: Å<sup>2</sup>).

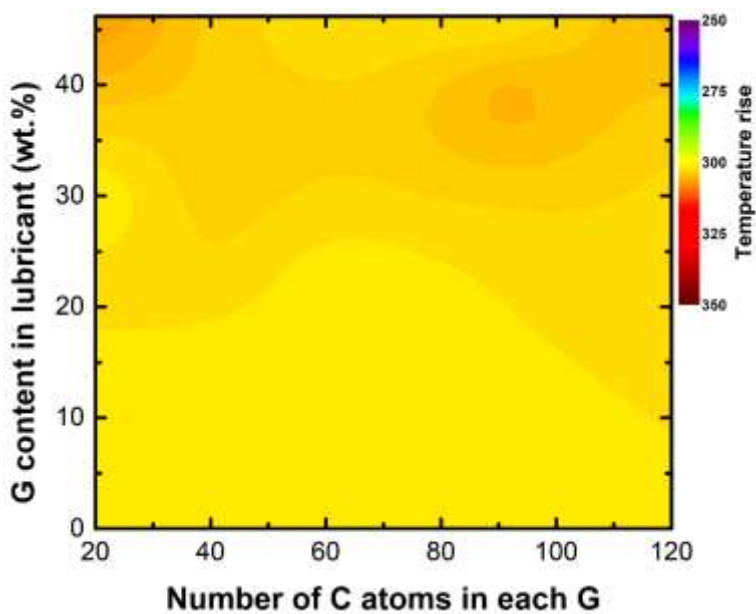

**Figure S2.** Rise of temperature with size and content of G additive during the sliding process.

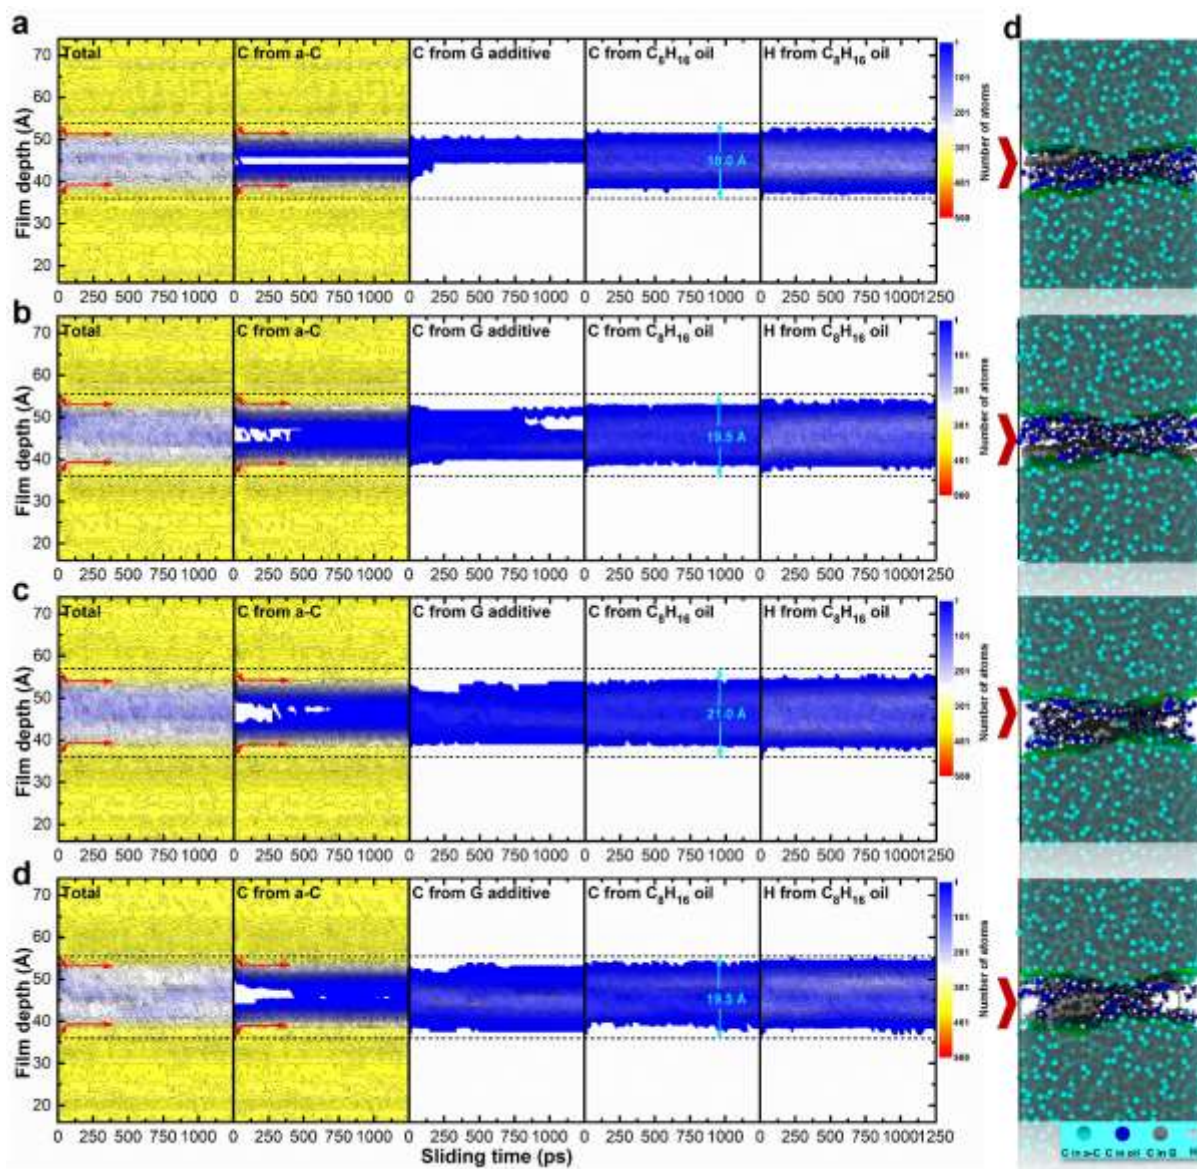

**Figure S3. Depth profiles of atomic distribution in the system.** (a), (b), (c), and (d) are the atomic distributions of C and H atoms versus sliding time in the system with G20 contents of 12.5 wt.%, 22.2 wt.%, 30.0 wt.%, and 46.2 wt.%, respectively. (d) Corresponding morphology at a sliding time of 1250 ps for each case.

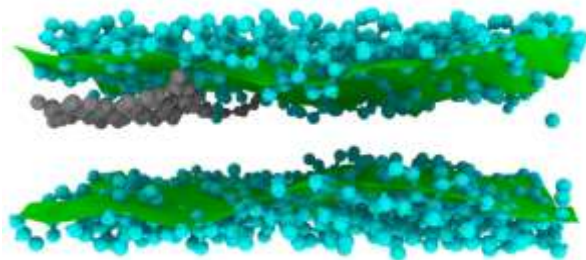

**Figure S4.** Morphology of friction interface for the a-C@C<sub>8</sub>H<sub>16</sub>+G60-12.5 wt.% system after sliding time of 1250 ps, in which the base oil molecules are neglected for view.

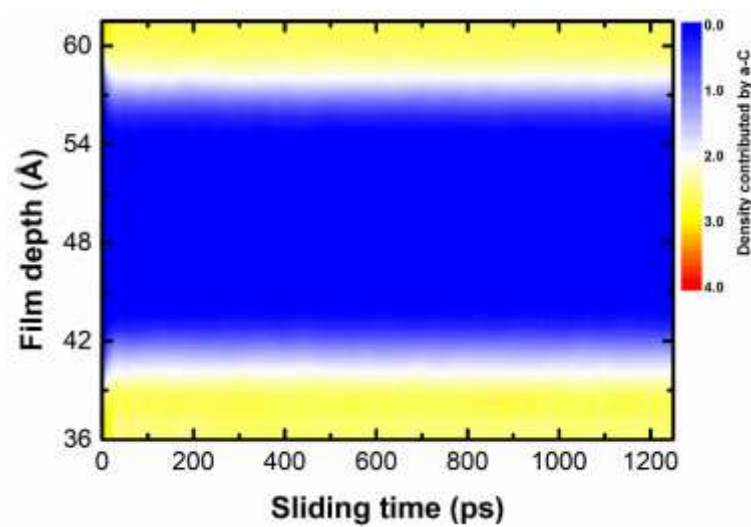

**Figure S5.** Density of friction interface, which is contributed by a-C, for a-C@C<sub>8</sub>H<sub>16</sub>+G120-22.2 wt.% system.

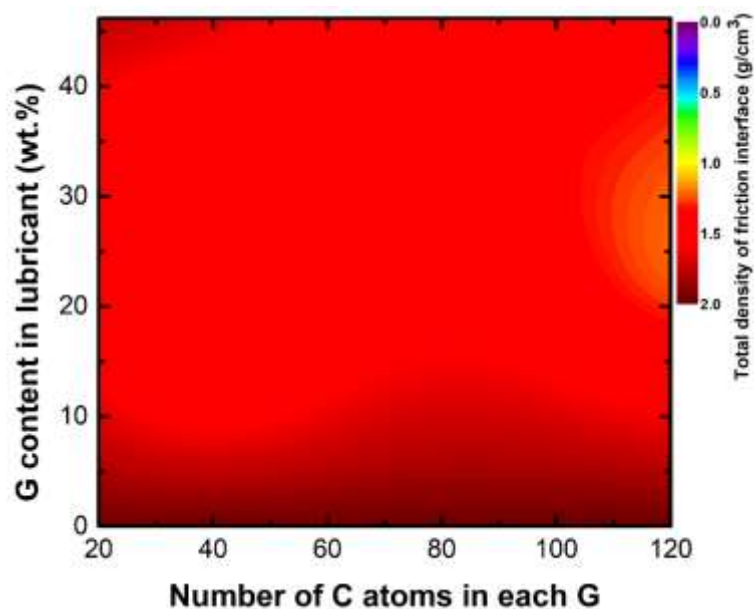

**Figure S6.** Total density of friction interface with size and content of G additive.

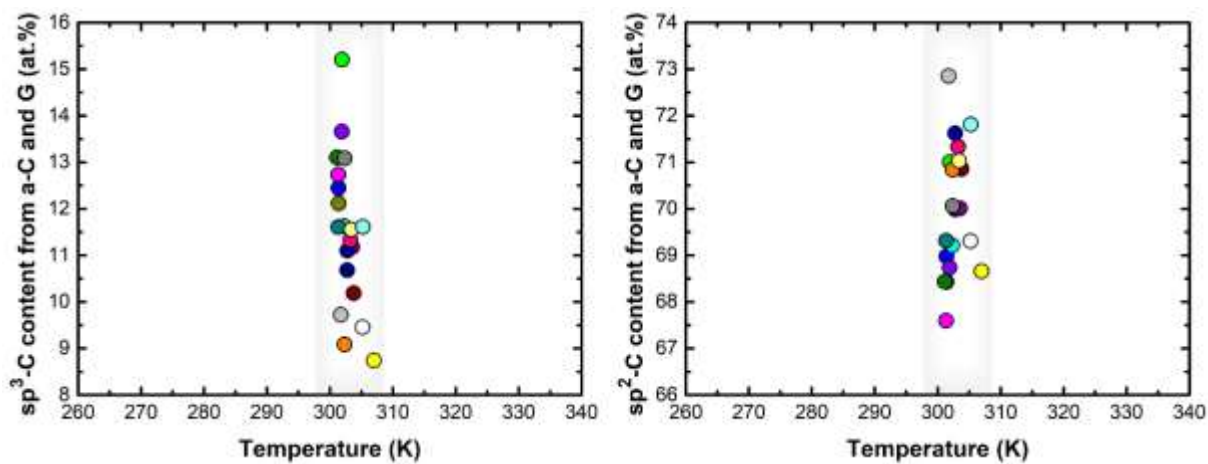

**Figure S7.** Relationship between the hybridized structure and temperature at the friction interface. Only the contributions of a-C and G to the hybridized structure are considered.
